# Supplementary material for: Pharmacological targeting of the mitochondrial calcium-dependent potassium channel KCa3.1 triggers cell death and reduces tumor growth and metastasis in vivo
Source: PubMed Central journal article supplement (PMC9768205; doi:10.1038/s41419-022-05463-8), 2022-12-20

# Fig. S1

**a**

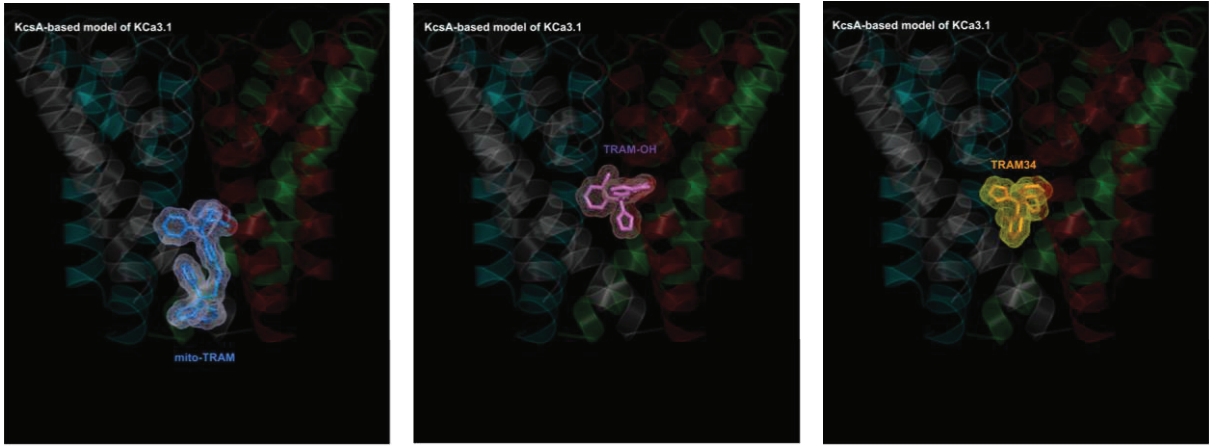

**b**

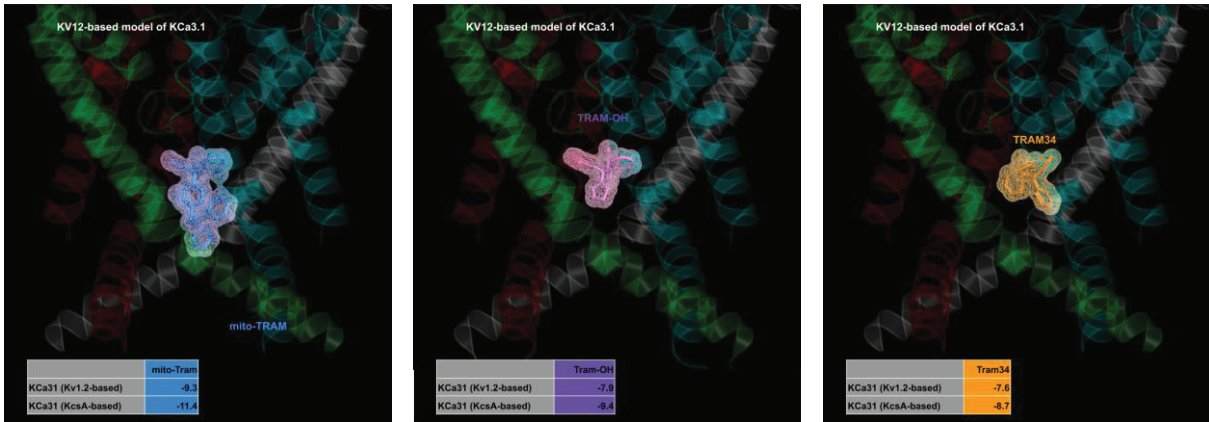

**c**

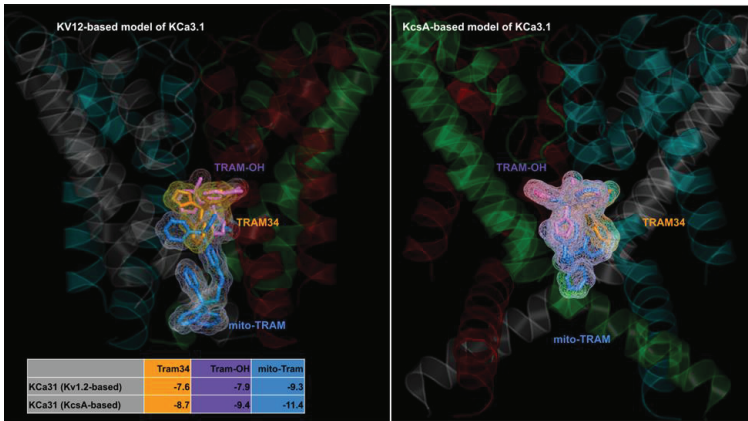

**a**

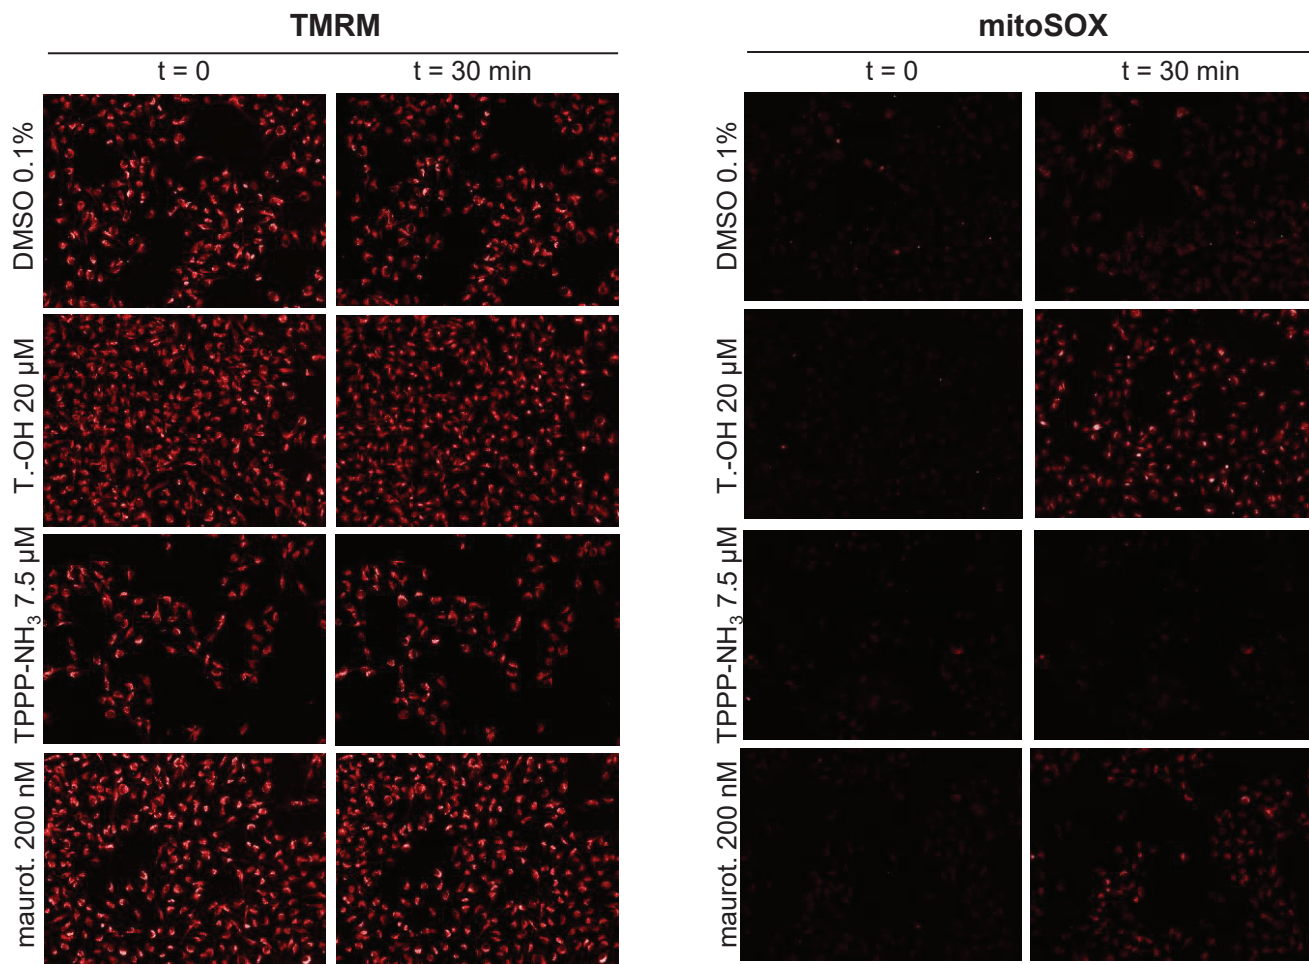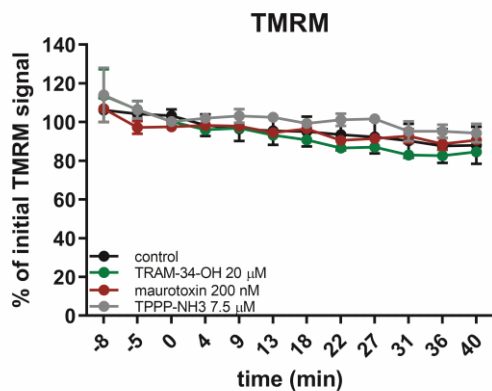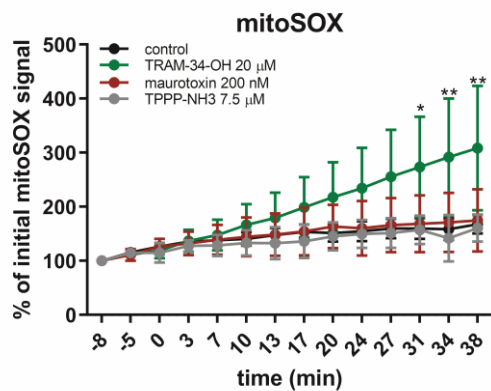

**b**

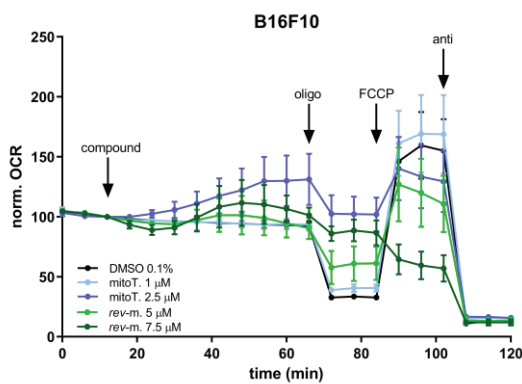

**c**

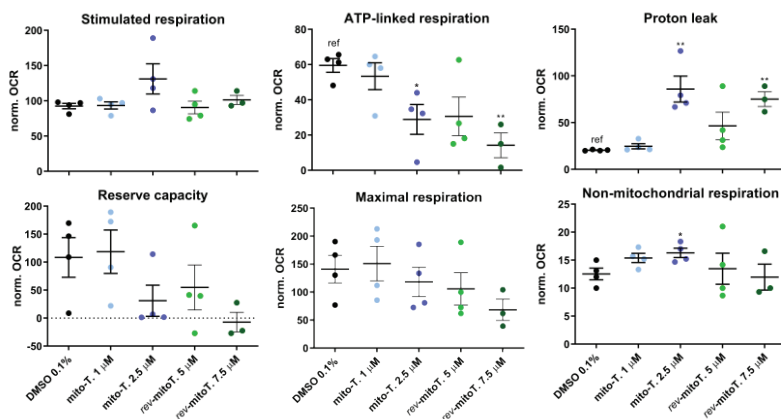

**d**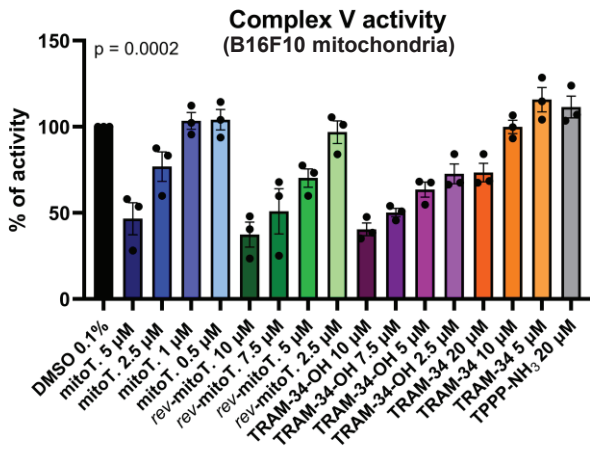**e**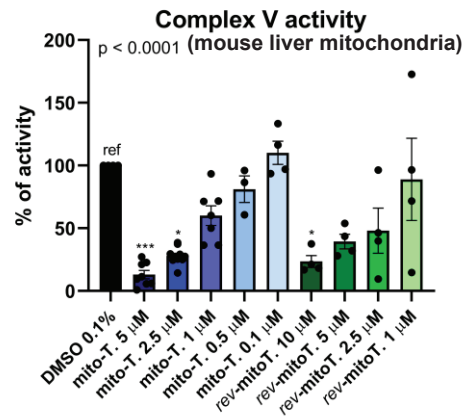**f**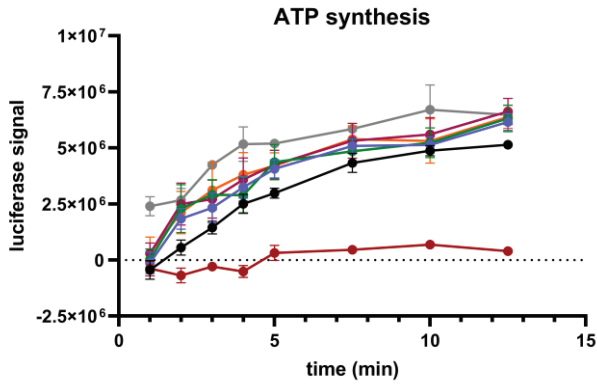**h**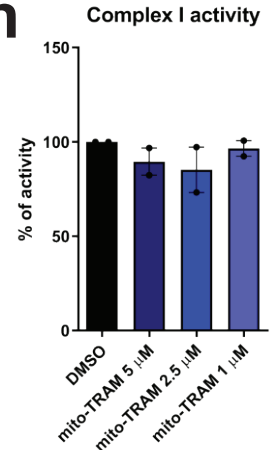**g**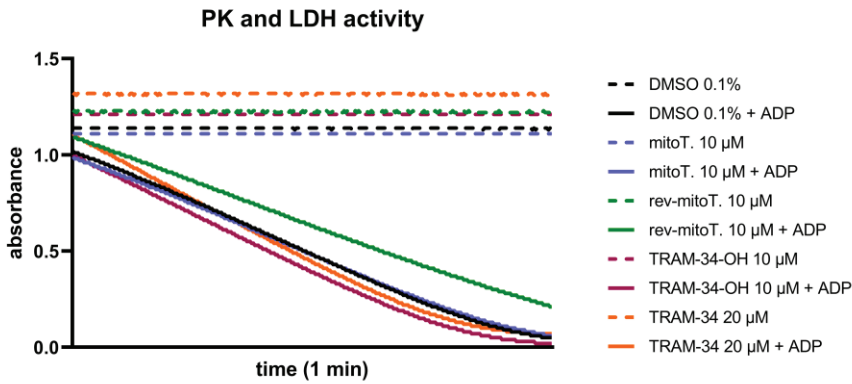**i**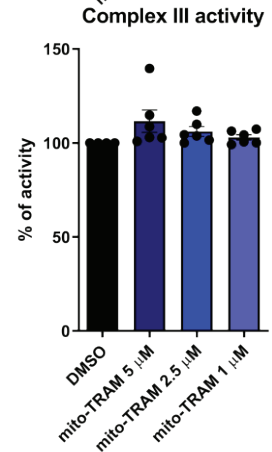

**Fig. S3**

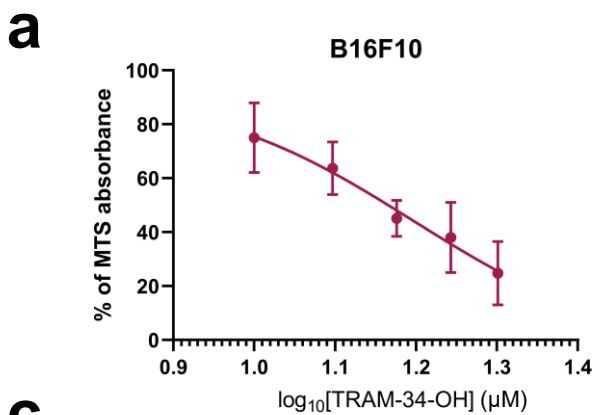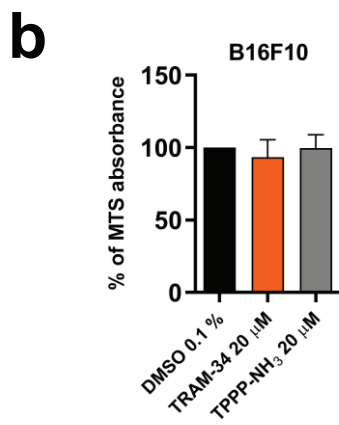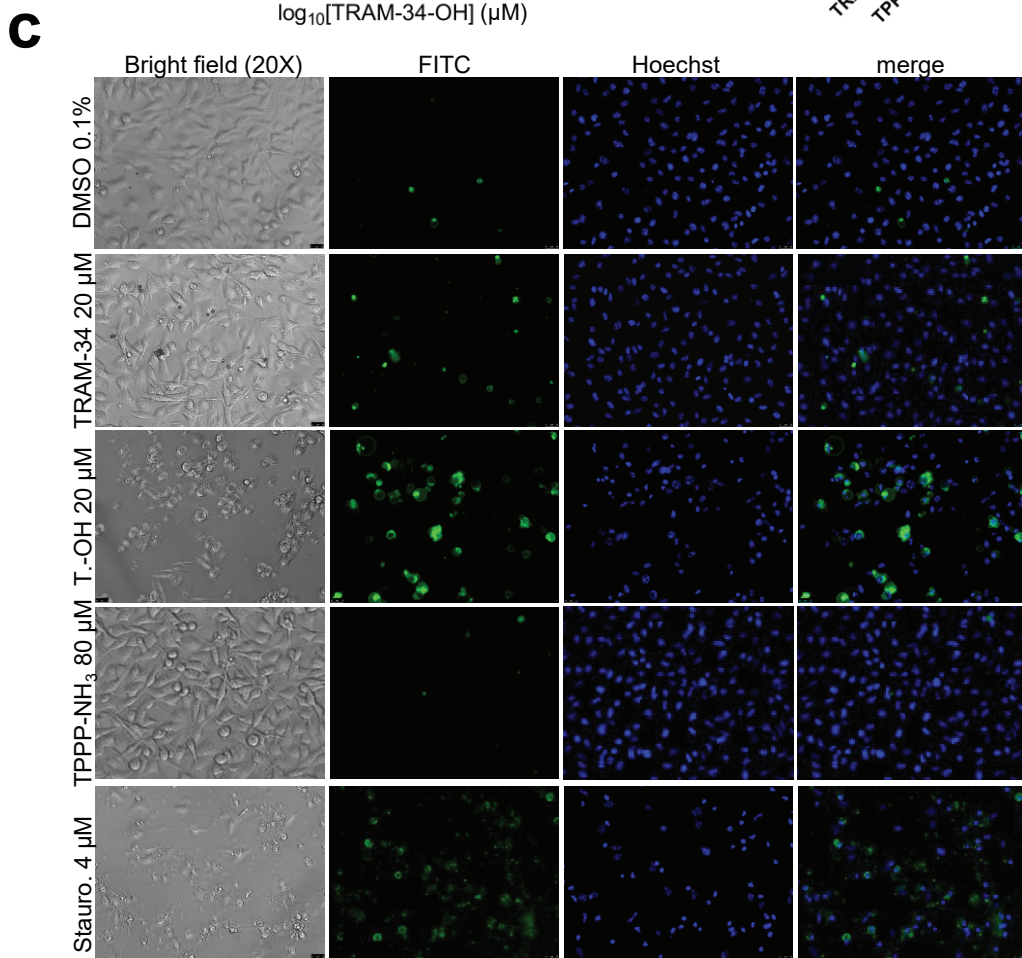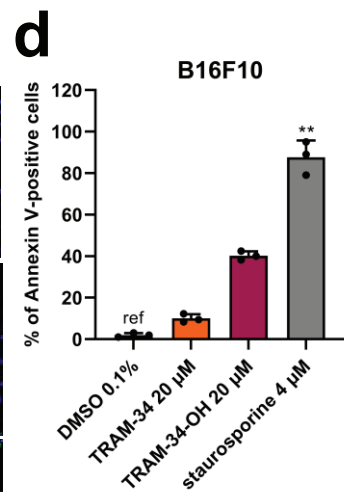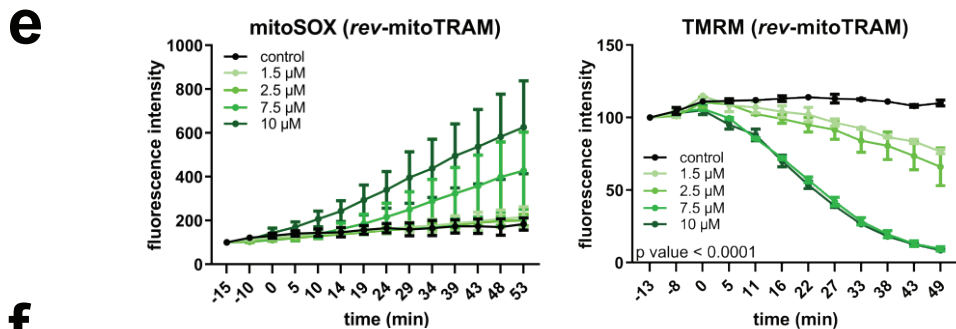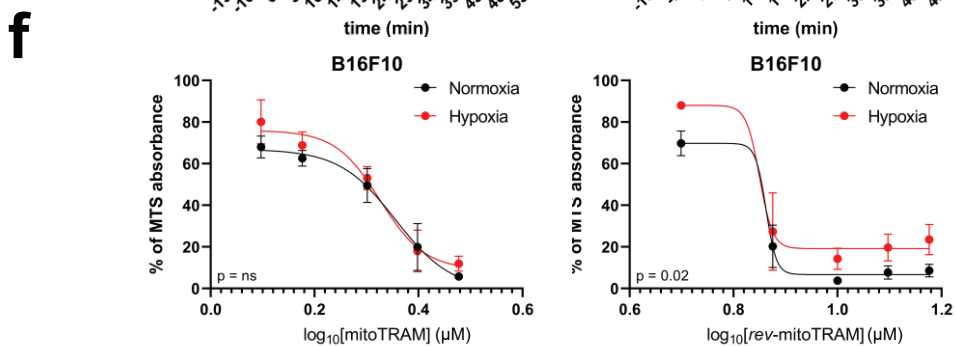



**Fig. S4**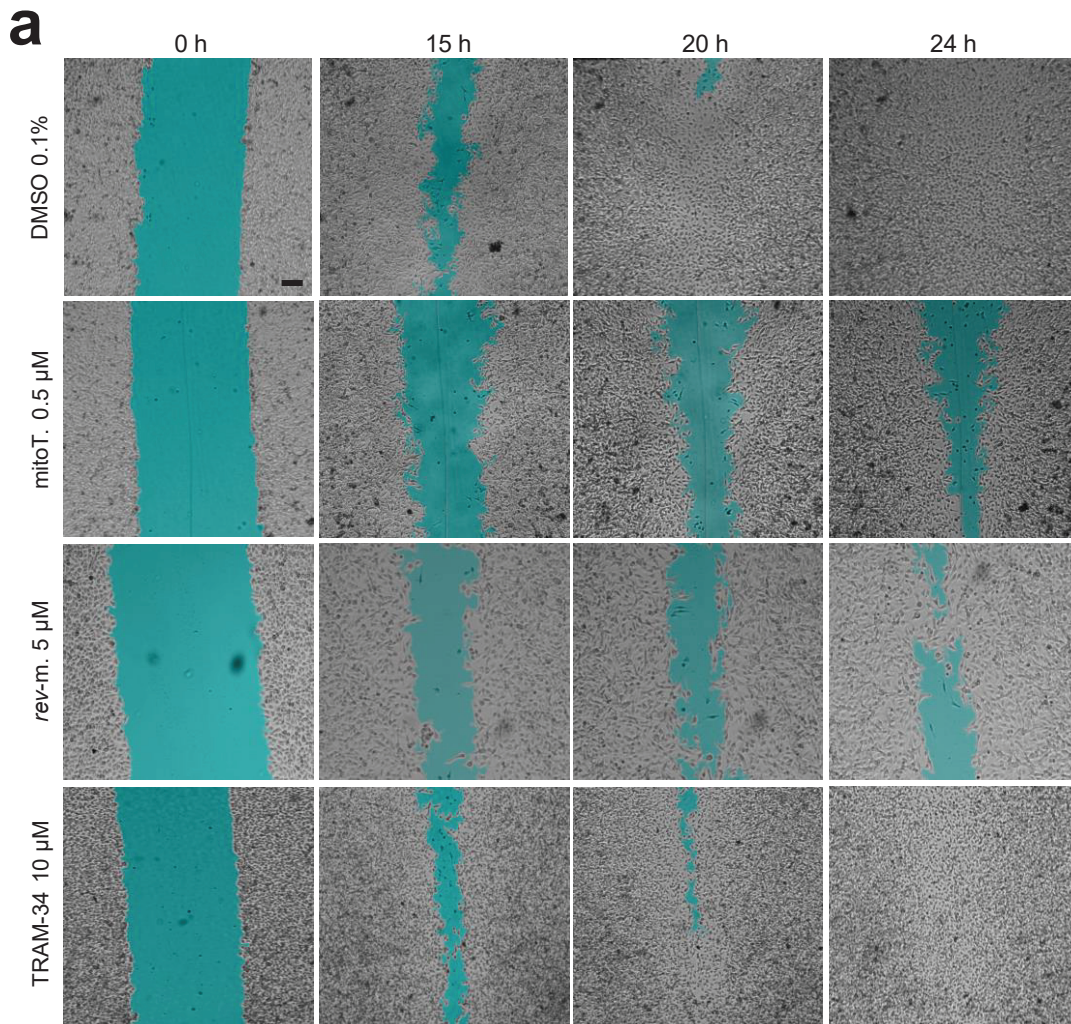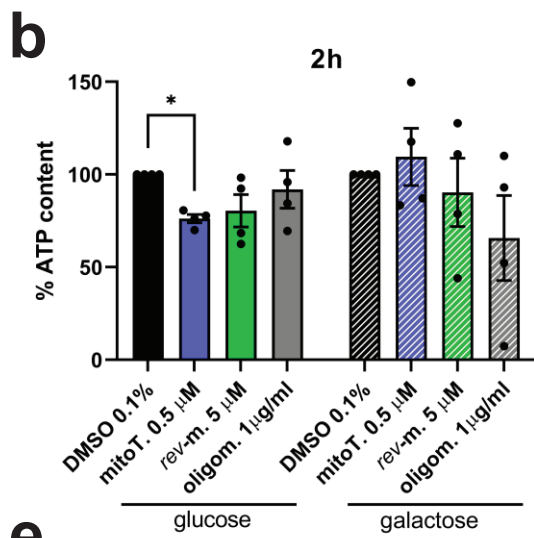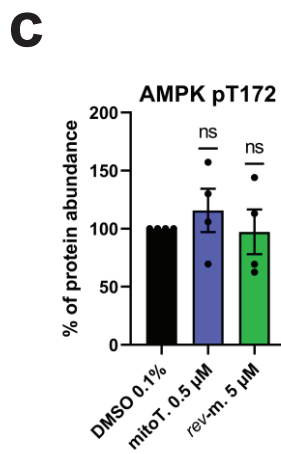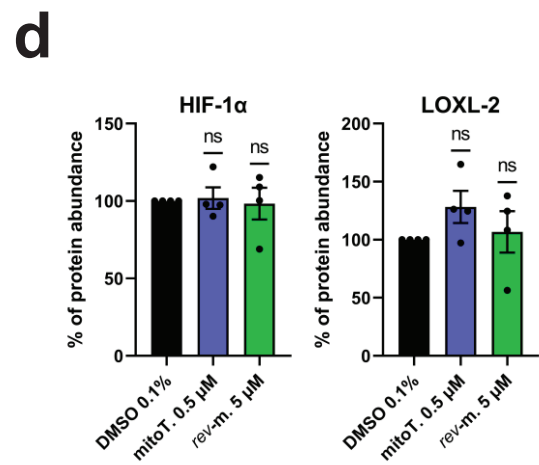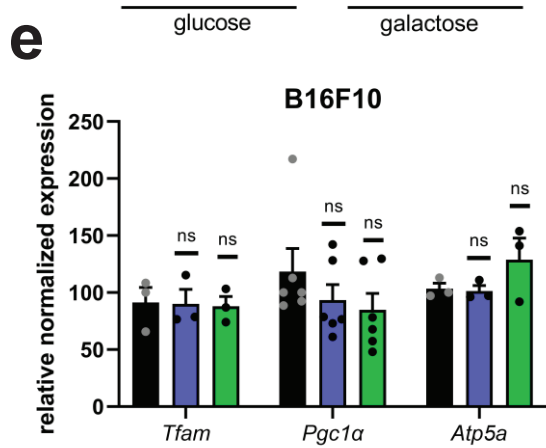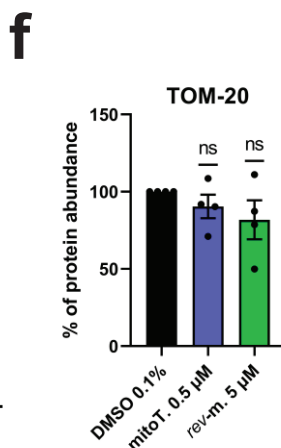







**Fig. S5**

**a**

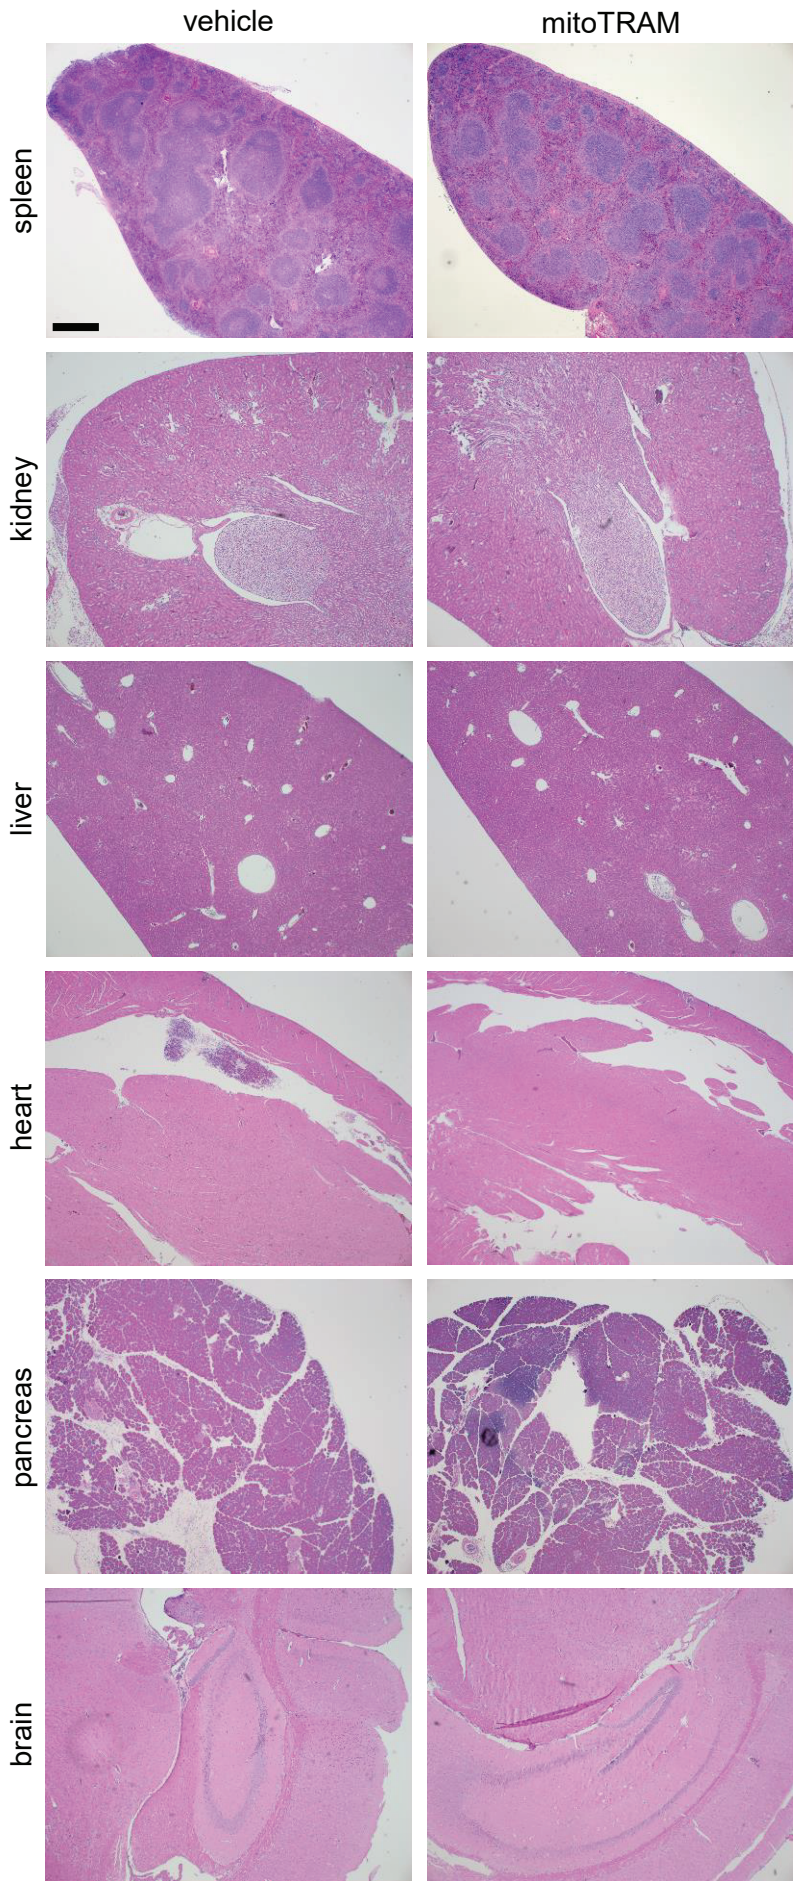

Supplement: 41419_2022_5463_MOESM2_ESM.pdf [file 41419_2022_5463_MOESM2_ESM.pdf]
