# Supplementary material for: Pharmacological targeting of the mitochondrial calcium-dependent potassium channel KCa3.1 triggers cell death and reduces tumor growth and metastasis in vivo
Source: PubMed Central journal article supplement (PMC9768205; doi:10.1038/s41419-022-05463-8), 2022-12-20

PMCA

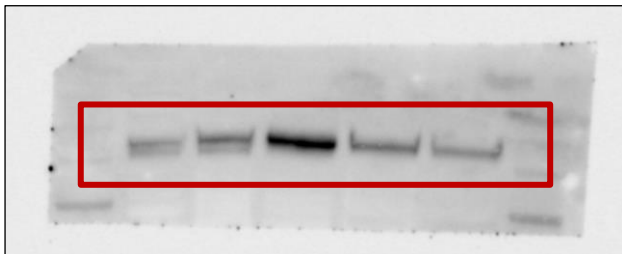

K<sub>Ca</sub>3.1

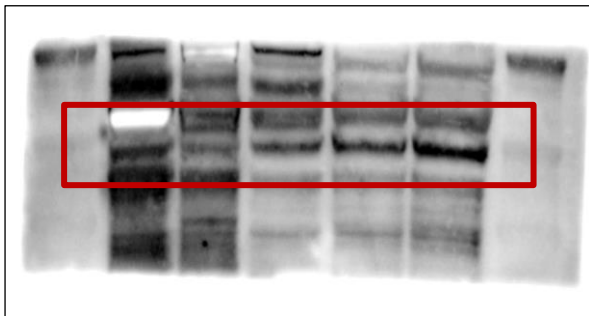

VDAC-1

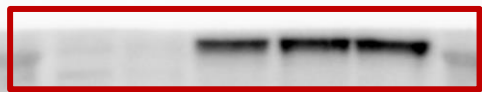

TOM-20

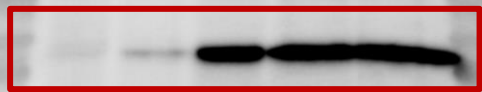

AMPK pT172

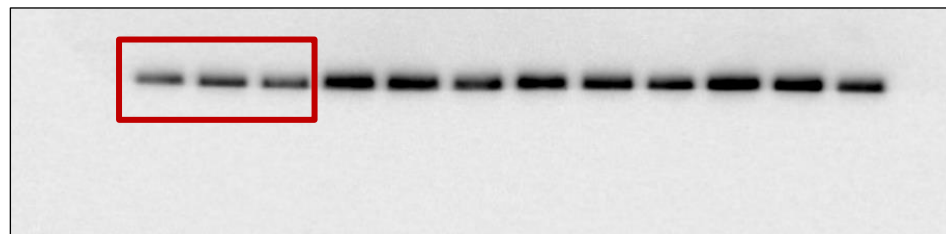

β-actin

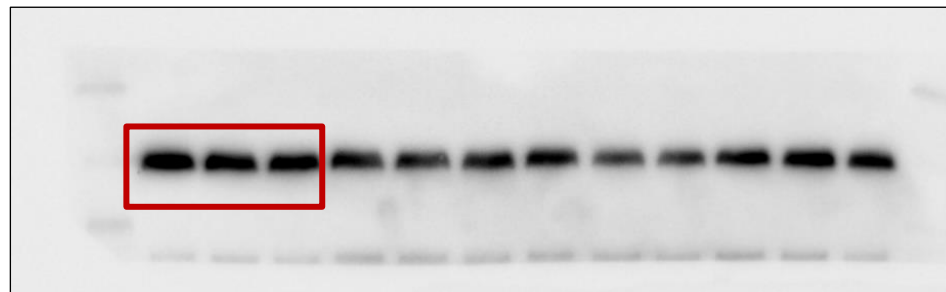

HIF-1 $\alpha$

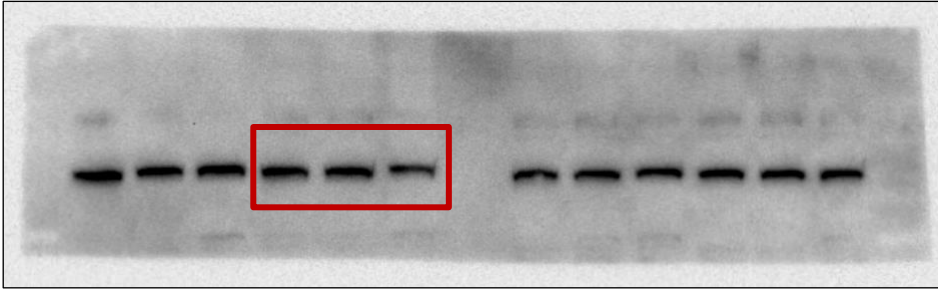

LOXL-2

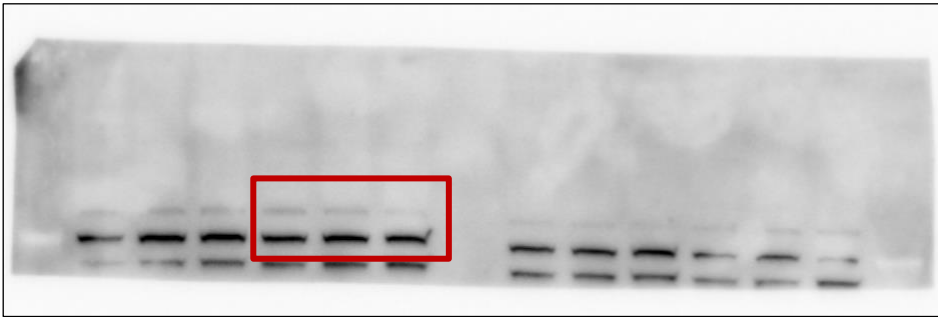

$\beta$ -actin

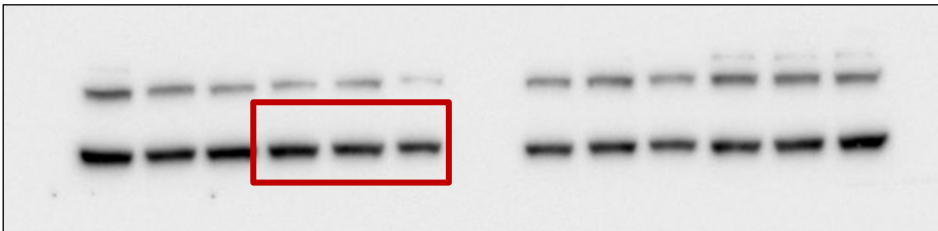

CV: ATP-5A  
CIII: UQCRC-2  
CIV: MTCO-1  
CII: SDHB  
CI: NDUFB8

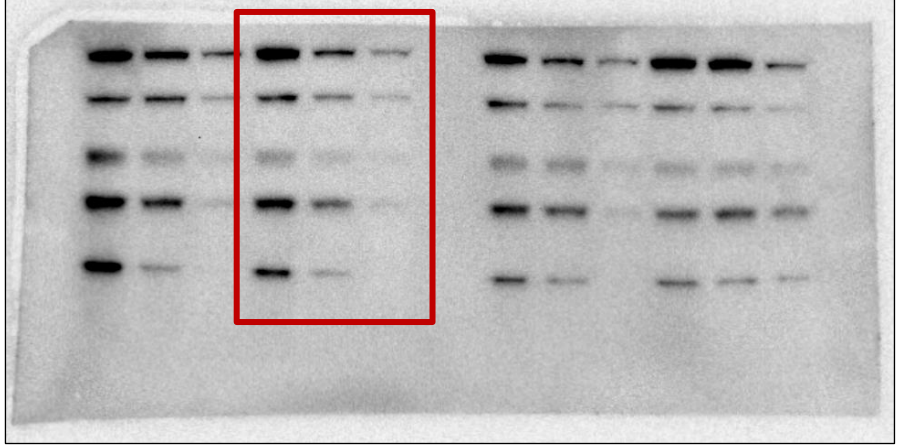

TOM-20

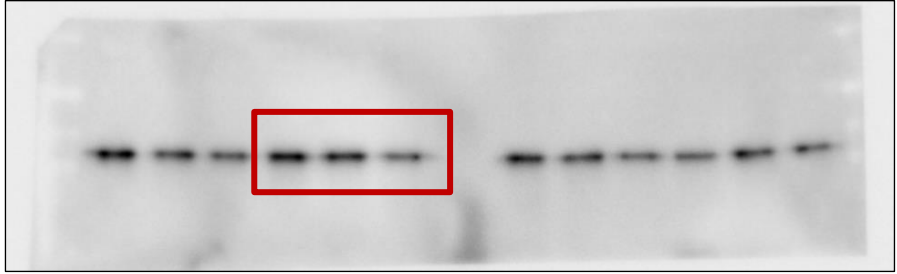

$\beta$ -actin

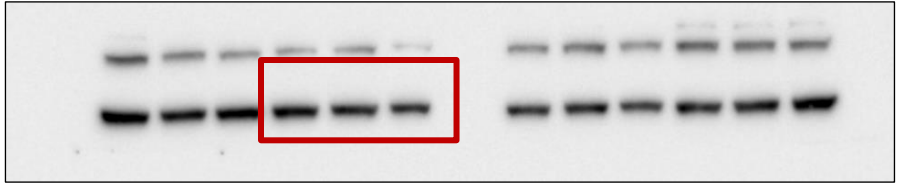

BNIP-3

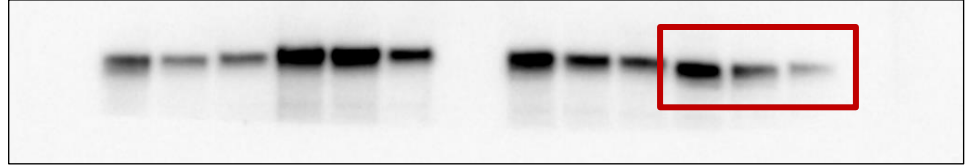

CDC-42

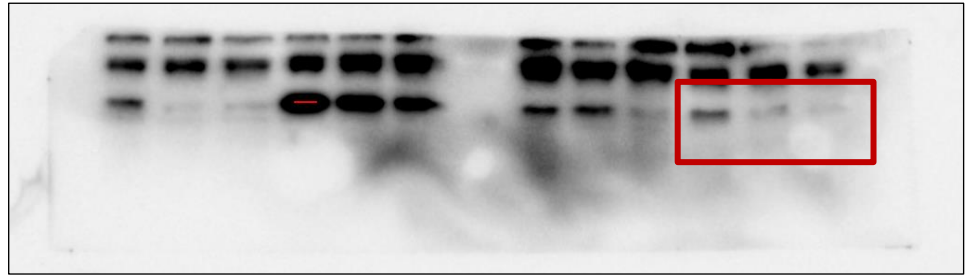

vinculin

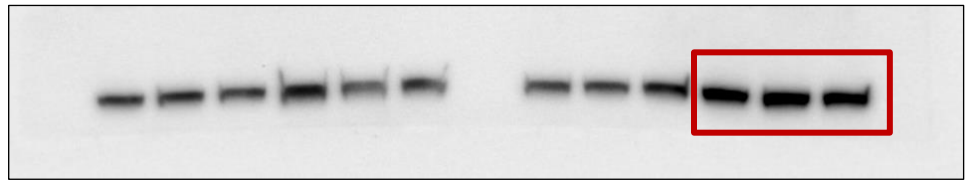

NF $\kappa$ B pS536

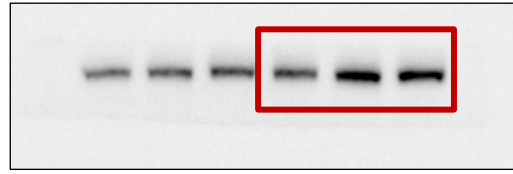

NF $\kappa$ B

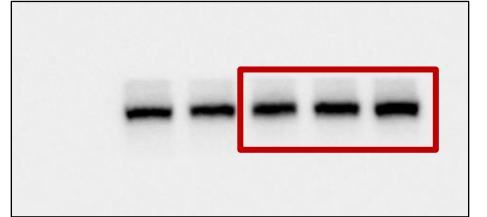

vinculin

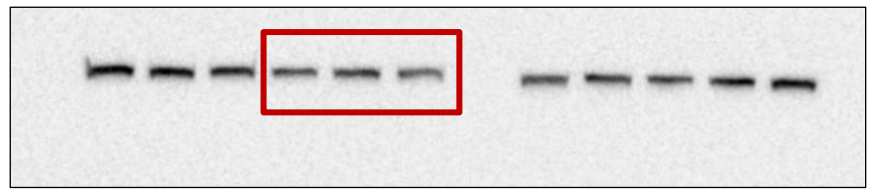

BNIP-3

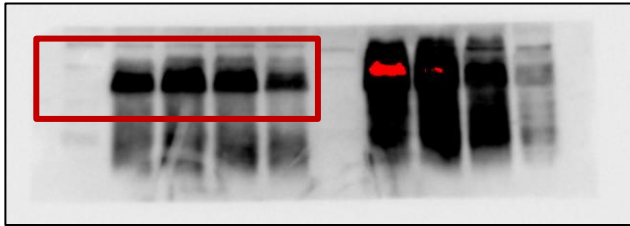

vinculin

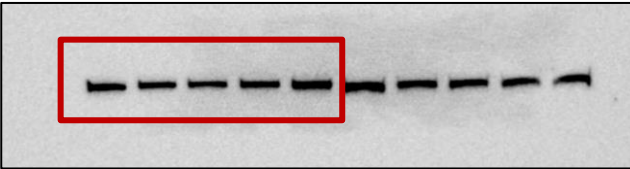

BNIP-3

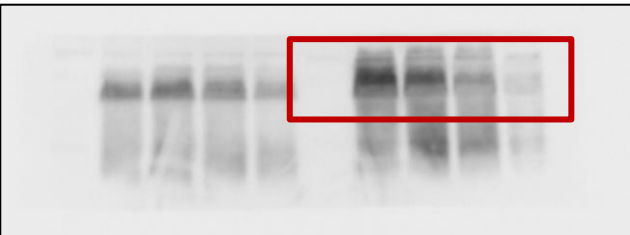

vinculin

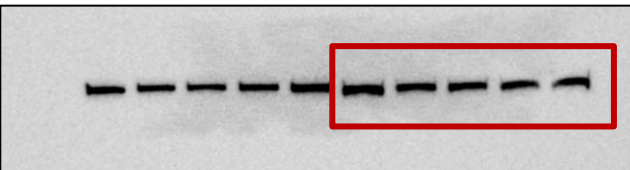

Supplement: 41419_2022_5463_MOESM3_ESM.pdf [file 41419_2022_5463_MOESM3_ESM.pdf]
